# Supplementary material
Source: publisher figshare collection journal article supplement (https://acs.figshare.com/ndownloader/files/9018127)
Supplement: Supplementary file 1 [file 9018127]

## Sheet: MOE Calculation
	∆G	∆G-M	Numb of HA	PP	∆g	∆g-M
1uv6	-6.95	-5.7707	10	A	-0.695	-0.57707
1uw6	-9.97	-7.8276	12	A	-0.830833	-0.6523
2pgz	-7.8	-9.0504	22	AA	-0.354545	-0.411382
2w8f	-8.55	-8.3213	26	AA	-0.328846	-0.32005
2w8g	-8.15	-9.8477	31	AA	-0.262903	-0.317668
2wn9	-11.57	-7.8235	22	PA	-0.525909	-0.355614
2wnc	-8.58	-8.7985	21	PA	-0.408571	-0.418976
2wnj	-8.8	-8.8077	23	PA	-0.382609	-0.382943
2wnl	-8.15	-5.8543	13	A	-0.626923	-0.450331
2wzy	-14.56	-12.7365	50	AA	-0.2912	-0.25473
2x00	-15.38	-9.059	37	AA	-0.415676	-0.244838
2xys	-10.08	-9.0443	25	AA	-0.4032	-0.361772
2xyt	-8.54	-10.2033	45	AA	-0.189778	-0.22674
2xz5	-5.44	-6.4328	10	A	-0.544	-0.64328
2y54	-7.2	-7.8709	17	NK	-0.423529	-0.462994
2y56	-9.5	-10.5466	26	NK	-0.365385	-0.405638
2y57	-10.2	-12.2674	25	NK	-0.408	-0.490696
2y58	-8.15	-10.2334	27	NK	-0.301852	-0.379015
2ymd	-4.29	-7.8801	13	AA	-0.33	-0.606162
2yme	-8.5	-9.2382	23	AA	-0.369565	-0.401661
3c84	-10.66	-9.1815	16	PA	-0.66625	-0.573844
3sh1	-10.03	-11.574	49	AA	-0.204694	-0.236204
3sio	-10.86	-13.28	49	AA	-0.221633	-0.27102
3u8j	-11.55	-8.3661	13	PA	-0.888462	-0.643546
3u8k	-11.76	-9.331	16	PA	-0.735	-0.583187
3u8l	-10.93	-8.5769	19	PA	-0.575263	-0.451416
3u8m	-12.07	-9.2374	14	PA	-0.862143	-0.659814
3u8n	-13.82	-10.3803	17	PA	-0.812941	-0.610606
3zdg	-9.65	-8.5393	13	A&PA	-0.742308	-0.656869
3zdh	-9.98	-8.863	14	A&PA	-0.712857	-0.633071
4afg	-11.27	-8.1353	16	PA	-0.704375	-0.508456
4afh	-12.95	-12.5734	25	A&PA	-0.518	-0.502936
4aft	-8.78	-8.7545	16	PA	-0.54875	-0.547156
4alx	-9.89	-10.2604	20	AA	-0.4945	-0.51302
4b5d	-10.72	-8.8655	18	PA	-0.595556	-0.492528
4bqt	-7.86	-8.2966	14	PA	-0.561429	-0.592614
4dbm	-10.35	-10.1385	29	NK	-0.356897	-0.349603
2byq	-10.67	-8.5006	14	A	-0.762143	-0.607186
2byr	-11.62	-8.5006	49	AA	-0.237143	-0.173482
2bys	-12.94	-12.9834	25	A&PA	-0.5176	-0.519336
2zju	-7.88	-8.3236	17	PA	-0.463529	-0.489624
4bfq	-6.72	-7.8736	27	NK	-0.248889	-0.291615
3wip	-7.91	-6.4089	10	A	-0.791	-0.64089
2zjv	-6.98	-8.1252	15	PA	-0.465333	-0.54168
3c79	-9.78	-7.8924	17	PA	-0.575294	-0.464259
4qaa	-8.75	-8.9722	24	NK	-0.364583	-0.373842
4qab	-13.18	-9.3133	24	NK	-0.549167	-0.388054
4qac	-12.77	-10.0591	16	NK	-0.798125	-0.628694
1ux2	-8.93	-7.668	15	NK	-0.595333	-0.5112
2xnt	-6.66	-6.2954	18	AA	-0.37	-0.349744
3wth	-8.53	-8.2297	17	PA	-0.501765	-0.4841
4um1	-7.84	-8.7157	16	PA	-0.49	-0.544731
4um3	-10.24	-8.7631	14	PA	-0.731429	-0.625936
2xnu	-7.2	-8.4829	23	AA	-0.313043	-0.368822
3wti	-7.81	-8.0193	15	PA	-0.520667	-0.53462
3wtj	-8.87	-8.8061	16	PA	-0.554375	-0.550381
3wtl	-9.56	-8.8843	17	A	-0.562353	-0.522606
3wtn	-9.57	-7.8907	14	A	-0.683571	-0.563621
∆G: ligand binding affinity
∆G-M: ligand binding affinity calculation using MOE
Numb of HA: Number of Heavy Atoms
PP: Pharmacological Properties
∆g: ligand efficacy
∆g-M: ligand efficacy calculation using ∆G-M
A: Full agonist
PA: Partial agonist
AA: Antagonist
NK: Unknown

## Sheet: ADT Calculation
	∆G	∆G-A	Numb of HA	PP	∆g	∆g-A
1uv6	-6.95	-5.29	10	A	-0.695	-0.529
1uw6	-9.97	-7.31	12	A	-0.830833	-0.609167
2pgz	-7.8	-8.23	22	AA	-0.354545	-0.374091
2w8f	-8.55	-9.82	26	AA	-0.328846	-0.377692
2w8g	-8.15	-10.71	31	AA	-0.262903	-0.345484
2wn9	-11.57	-9.99	22	PA	-0.525909	-0.454091
2wnc	-8.58	-8.89	21	PA	-0.408571	-0.423333
2wnj	-8.8	-8.6	23	PA	-0.382609	-0.373913
2wnl	-8.15	-5.29	13	A	-0.626923	-0.406923
2wzy	-14.56	-15.11	50	AA	-0.2912	-0.3022
2x00	-15.38	-13.76	37	AA	-0.415676	-0.371892
2xys	-10.08	-10.49	25	AA	-0.4032	-0.4196
2xyt	-8.54	-11.16	45	AA	-0.189778	-0.248
2xz5	-5.44	-4.8	10	A	-0.544	-0.48
2y54	-7.2	-8.35	17	NK	-0.423529	-0.491176
2y56	-9.5	-10.91	26	NK	-0.365385	-0.419615
2y57	-10.2	-12.21	25	NK	-0.408	-0.4884
2y58	-8.15	-10.65	27	NK	-0.301852	-0.394444
2ymd	-4.29	-8.16	13	AA	-0.33	-0.627692
2yme	-8.5	-8.71	23	AA	-0.369565	-0.378696
3c84	-10.66	-8.67	16	PA	-0.66625	-0.541875
3sh1	-10.03	-10.94	49	AA	-0.204694	-0.223265
3sio	-10.86	-11.94	49	AA	-0.221633	-0.243673
3u8j	-11.55	-6.65	13	PA	-0.888462	-0.511538
3u8k	-11.76	-7.68	16	PA	-0.735	-0.48
3u8l	-10.93	-8.05	19	PA	-0.575263	-0.423684
3u8m	-12.07	-7.91	14	PA	-0.862143	-0.565
3u8n	-13.82	-9.6	17	PA	-0.812941	-0.564706
3zdg	-9.65	-6.23	13	A&PA	-0.742308	-0.479231
3zdh	-9.98	-6.59	14	A&PA	-0.712857	-0.470714
4afg	-11.27	-9.02	16	PA	-0.704375	-0.56375
4afh	-12.95	-14.01	25	A&PA	-0.518	-0.5604
4aft	-8.78	-9.21	16	PA	-0.54875	-0.575625
4alx	-9.89	-10.33	20	AA	-0.4945	-0.5165
4b5d	-10.72	-8.89	18	PA	-0.595556	-0.493889
4bqt	-7.86	-7.4	14	PA	-0.561429	-0.528571
4dbm	-10.35	-10.25	29	NK	-0.356897	-0.353448
2byq	-10.67	-8.94	14	A	-0.762143	-0.638571
2byr	-11.62	-11.15	49	AA	-0.237143	-0.227551
2bys	-12.94	-12.51	25	A&PA	-0.5176	-0.5004
2zju	-7.88	-7.15	17	PA	-0.463529	-0.420588
4bfq	-6.72	-8.12	27	NK	-0.248889	-0.300741
3wip	-7.91	-3.37	10	A	-0.791	-0.337
2zjv	-6.98	-7.59	15	PA	-0.465333	-0.506
3c79	-9.78	-7.83	17	PA	-0.575294	-0.460588
4qaa	-8.75	-7.04	24	NK	-0.364583	-0.293333
4qab	-13.18	-10.06	24	NK	-0.549167	-0.419167
4qac	-12.77	-10.9	16	NK	-0.798125	-0.68125
2br8	-10.26	-13	113	AA	-0.0907965	-0.115044
2c9t	-10.16	-10.76	90	AA	-0.112889	-0.119556
1ux2	-8.93	-5.27	15	NK	-0.595333	-0.351333
2xnt	-6.66	-6.85	18	AA	-0.37	-0.380556
3wth	-8.53	-7.11	17	PA	-0.501765	-0.418235
4um1	-7.84	-7.24	16	PA	-0.49	-0.4525
4um3	-10.24	-7.53	14	PA	-0.731429	-0.537857
2xnu	-7.2	-9.87	23	AA	-0.313043	-0.42913
3wti	-7.81	-7.67	15	PA	-0.520667	-0.511333
3wtj	-8.87	-8.34	16	PA	-0.554375	-0.52125
3wtl	-9.56	-8.45	17	A	-0.562353	-0.497059
3wtn	-9.57	-6.76	14	A	-0.683571	-0.482857
		∆G: ligand binding affinity
		∆G-A: ligand binding affinity calculation using Autodock
		Numb of HA: Number of Heavy Atoms
		PP: Pharmacological Properties
		∆g: ligand efficacy
		∆g-A: ligand efficacy calculation using ∆G-M
		A: Full agonist
		PA: Partial agonist
		AA: Antagonist
		NK: Unknown

## Sheet: MMPBSA Calculation
	∆G	∆G-lig1	∆G-conf1	Numb of HA	PP	∆g	∆g-lig1	∆g-conf1
1uv6	-6.95	-28.463	-37.4658	10	A	-0.695	-2.8463	-3.74658
1uw6	-9.97	-36.8679	-37.2936	12	A	-0.830833	-3.07232	-3.1078
2pgz	-7.8	-49.1073	-43.394	22	AA	-0.354545	-2.23215	-1.97245
2w8f	-8.55	-32.455	-33.5623	26	AA	-0.328846	-1.24827	-1.29086
2w8g	-8.15	-34.1227	-38.6138	31	AA	-0.262903	-1.10073	-1.24561
2wn9	-11.57	-29.1856	-23.7011	22	PA	-0.525909	-1.32662	-1.07732
2wnc	-8.58	-47.0693	-45.8095	21	PA	-0.408571	-2.2414	-2.1814
2wnj	-8.8	-34.5565	-33.822	23	PA	-0.382609	-1.50246	-1.47052
2wnl	-8.15	-13.9421	-16.981	13	A	-0.626923	-1.07247	-1.30623
2wzy	-14.56	-74.3805	-74.3111	50	AA	-0.2912	-1.48761	-1.48622
2x00	-15.38	-60.897	-60.1328	37	AA	-0.415676	-1.64586	-1.62521
2xys	-10.08	-46.2825	-47.6765	25	AA	-0.4032	-1.8513	-1.90706
2xyt	-8.54	-49.8969	-49.3993	45	AA	-0.189778	-1.10882	-1.09776
2xz5	-5.44	-22.0534	-31.7671	10	A	-0.544	-2.20534	-3.17671
2y54	-7.2	-38.0965	-39.6852	17	NK	-0.423529	-2.24097	-2.33442
2y56	-9.5	-53.1144	-46.9005	26	NK	-0.365385	-2.04286	-1.80387
2y57	-10.2	-58.0991	-57.3109	25	NK	-0.408	-2.32396	-2.29244
2y58	-8.15	-56.5874	-46.1563	27	NK	-0.301852	-2.09583	-1.70949
2ymd	-4.29	-46.4983	-38.3953	13	AA	-0.33	-3.57679	-2.95348
2yme	-8.5	-47.8917	-45.004	23	AA	-0.369565	-2.08225	-1.9567
3c84	-10.66	-46.2365	-46.575	16	PA	-0.66625	-2.88978	-2.91094
3sh1	-10.03	-41.2625	-37.3332	49	AA	-0.204694	-0.842092	-0.761902
3sio	-10.86	-45.4101	-46.2656	49	AA	-0.221633	-0.926737	-0.944196
3u8j	-11.55	-47.6654	-47.5157	13	PA	-0.888462	-3.66657	-3.65505
3u8k	-11.76	-51.9093	-48.9339	16	PA	-0.735	-3.24433	-3.05837
3u8l	-10.93	-47.0751	-48.1511	19	PA	-0.575263	-2.47764	-2.53427
3u8m	-12.07	-50.7249	-50.4037	14	PA	-0.862143	-3.62321	-3.60026
3u8n	-13.82	-58.6767	-59.9722	17	PA	-0.812941	-3.45157	-3.52778
3zdg	-9.65	-44.5165	-44.7	13	PA	-0.742308	-3.42435	-3.43846
3zdh	-9.98	-43.4197	-33.7912	14	A&PA	-0.712857	-3.10141	-2.41366
4afg	-11.27	-36.7558	-37.0127	16	A&PA	-0.704375	-2.29724	-2.31329
4afh	-12.95	-65.9889	-56.9096	25	A&PA	-0.518	-2.63956	-2.27638
4aft	-8.78	-43.3255	-44.5683	16	PA	-0.54875	-2.70784	-2.78552
4alx	-9.89	-51.9014	-52.1238	20	AA	-0.4945	-2.59507	-2.60619
4b5d	-10.72	-45.8955	-34.5322	18	PA	-0.595556	-2.54975	-1.91846
4bqt	-7.86	-40.2514	-40.1494	14	PA	-0.561429	-2.8751	-2.86781
4dbm	-10.35	-39.7655	-29.3694	29	NK	-0.356897	-1.37122	-1.01274
2byq	-10.67	-42.63	-43.1092	14	A	-0.762143	-3.045	-3.07923
2byr	-11.62	-52.5714	-46.2928	49	AA	-0.237143	-1.07289	-0.944751
2bys	-12.94	-60.3712	-63.7117	25	A&PA	-0.5176	-2.41485	-2.54847
2zju	-7.88	-33.4908	-32.7063	17	PA	-0.463529	-1.97005	-1.9239
4bfq	-6.72	-14.0311	-28.0633	27	NK	-0.248889	-0.51967	-1.03938
3wip	-7.91	-28.3866	-23.8188	10	A	-0.791	-2.83866	-2.38188
2zjv	-6.98	-35.6429	-42.8747	15	PA	-0.465333	-2.37619	-2.85831
3c79	-9.78	-41.4139	-37.0529	17	PA	-0.575294	-2.43611	-2.17958
4qaa	-8.75	-30.4143	-44.19	24	NK	-0.364583	-1.26726	-1.84125
4qab	-13.18	-45.7187	-45.6059	24	NK	-0.549167	-1.90495	-1.90025
4qac	-12.77	-41.4139	-38.869	16	NK	-0.798125	-2.58837	-2.42931
1ux2	-8.93	-35.5866	-42.2219	15	NK	-0.595333	-2.37244	-2.81479
2xnt	-6.66	-23.2038	-31.39	18	AA	-0.37	-1.2891	-1.74389
3wth	-8.53	-33.5714	-33.0908	17	PA	-0.501765	-1.97479	-1.94652
4um1	-7.84	-49.0422	-46.1658	16	PA	-0.49	-3.06514	-2.88536
4um3	-10.24	-45.1177	-46.0089	14	PA	-0.731429	-3.22269	-3.28635
2xnu	-7.2	-24.3732	-40.4564	23	AA	-0.313043	-1.0597	-1.75897
3wti	-7.81	-31.1125	-29.2298	15	PA	-0.520667	-2.07417	-1.94865
3wtj	-8.87	-39.6836	-39.3784	16	PA	-0.554375	-2.48022	-2.46115
3wtl	-9.56	-38.0438	-38.3564	17	A	-0.562353	-2.23787	-2.25626
3wtn	-9.57	-38.87	-39.3784	14	A	-0.683571	-2.77643	-2.81274
∆G: ligand binding affinity
∆G-lig1: ligand binding affinity calculation using MMPBSA on the crystal structures directly.
∆G-conf1: ligand binding affinity calculation using MMPBSA on the predicted binding mode using MOE.
Numb of HA: Number of Heavy Atoms
PP: Pharmacological Properties
∆g: ligand efficacy
∆g-lig1: ligand efficacy calculation using ∆G-lig1
∆g-conf1: ligand efficacy calculation using ∆G-conf1
A: Full agonist
PA: Partial agonist
AA: Antagonist
NK: Unknown
